# Supplementary material for: Anti-Helicobacter, Antitubercular and Cytotoxic Activities of Scalaranes from the Red Sea Sponge Hyrtios erectus
Source: PubMed Central journal article supplement (PMC6017761; doi:10.3390/molecules23040978), 2018-04-23
Supplement: molecules-23-00978-s001.pdf [file molecules-23-00978-s001.pdf]

# Anti-*Helicobacter*, Antitubercular and Cytotoxic Activities of Scalaranes from the Red Sea Sponge *Hyrtios erectus*

Abdulrahman M. Alahdal <sup>1</sup>, Hani Z. Asfour <sup>2</sup>, Safwat A. Ahmed <sup>3</sup>, Ahmed O. Noor <sup>1</sup>, Ahmed M. Al-Abd <sup>4</sup>, Mahmoud A. Elfaky <sup>5</sup> and Sameh S. Elhady <sup>5,\*</sup>

## Additional Experimental Detail.

- 1) **Figure S1.** ESIMS spectrum of compound **14**
- 2) **Figure S2.** <sup>1</sup>H-NMR spectrum of compound **14** (CDCl<sub>3</sub>)
- 3) **Figure S3.** <sup>13</sup>C-NMR spectrum of compound **14** (CDCl<sub>3</sub>)
- 4) **Figure S4.** HSQC spectrum of compound **14** (CDCl<sub>3</sub>)
- 5) **Figure S5.** HMBC spectrum of compound **14** (CDCl<sub>3</sub>)
- 6) **Figure S6.** NOESY spectrum of compound **14** (CDCl<sub>3</sub>)

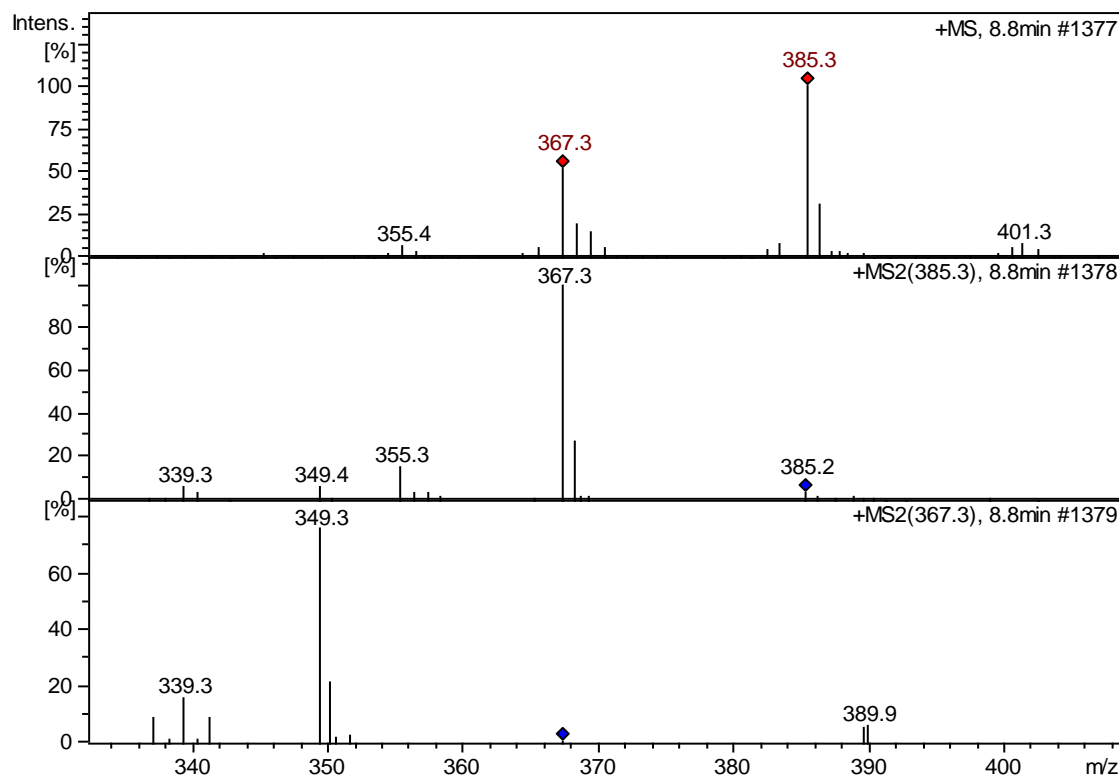

**Figure S1.** ESIMS spectrum of compound **14**

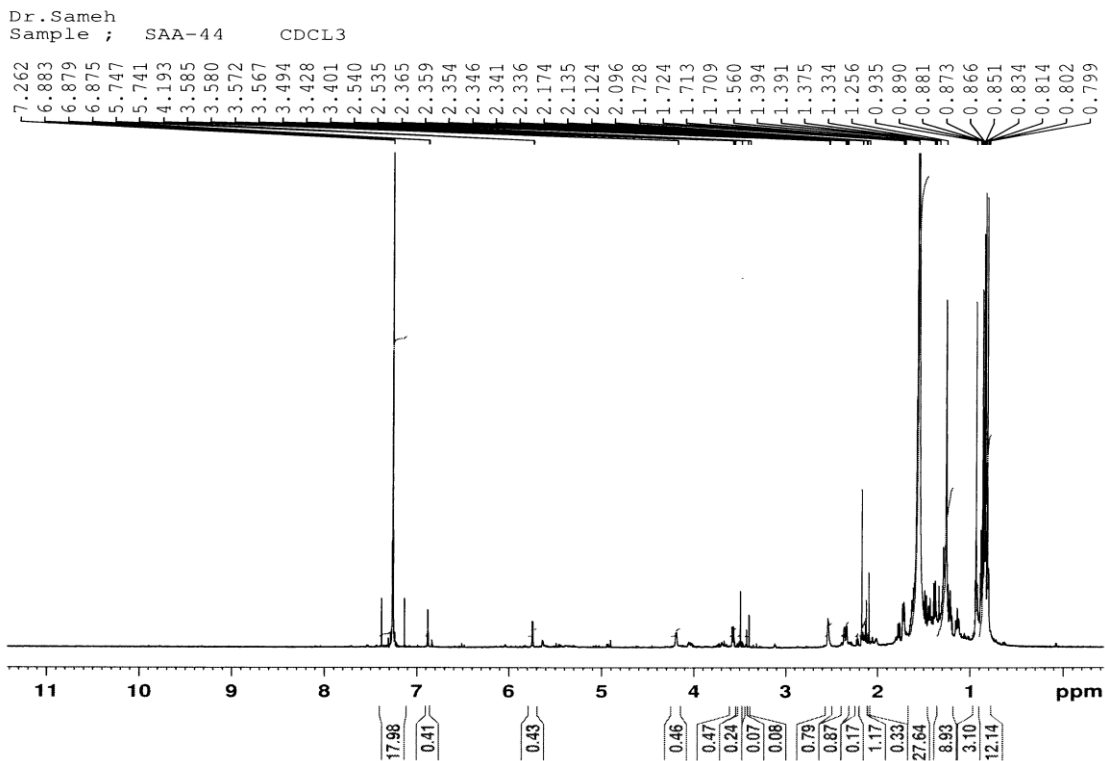

Figure S2. <sup>1</sup>H-NMR spectrum of compound **14** (CDCl<sub>3</sub>)

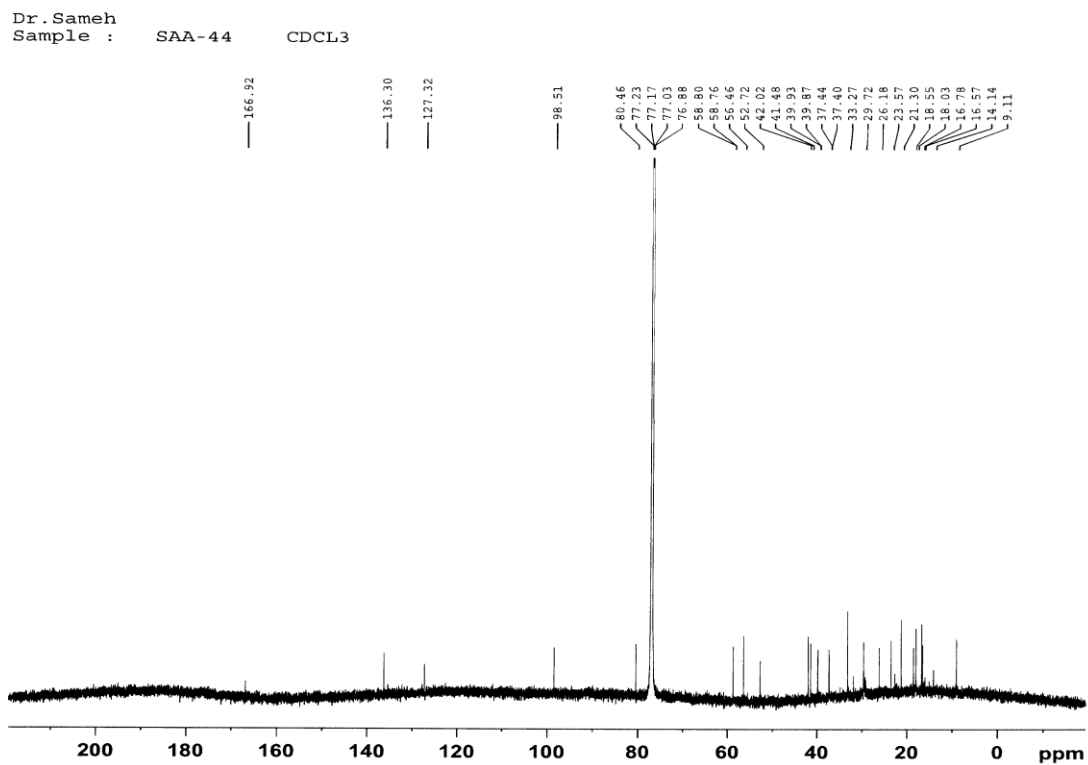

Figure S3. <sup>13</sup>C-NMR spectrum of compound **14** (CDCl<sub>3</sub>)

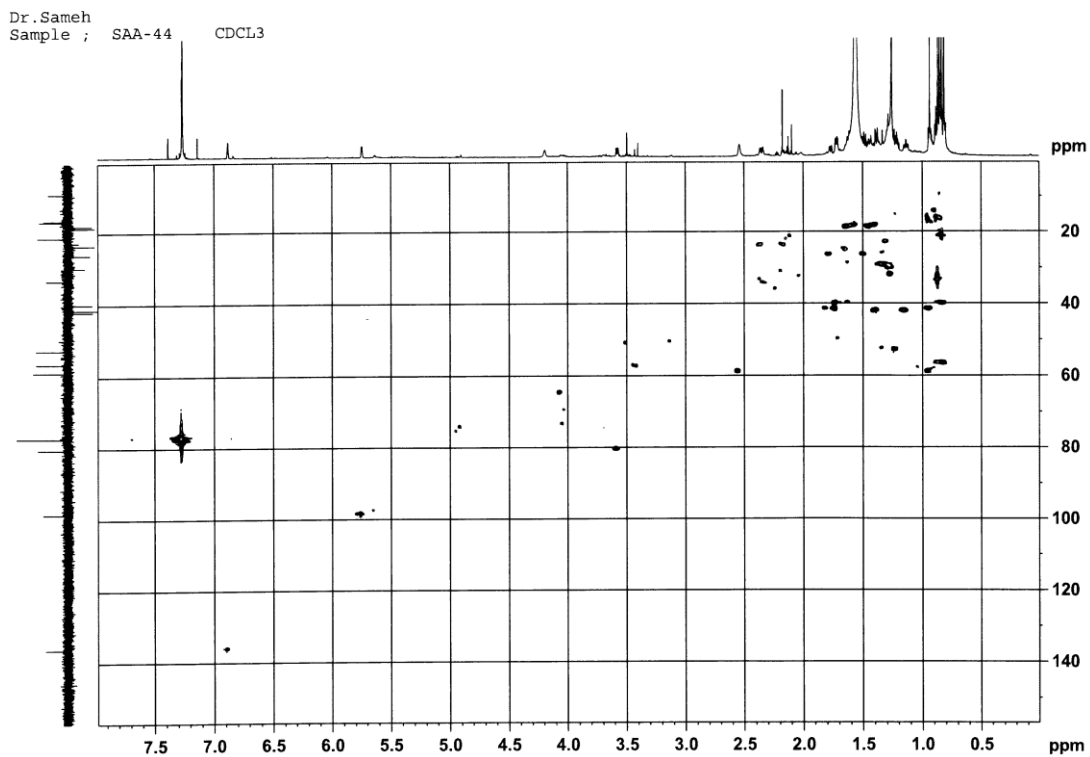

**Figure S4.** HSQC spectrum of compound **14** (CDCl<sub>3</sub>)

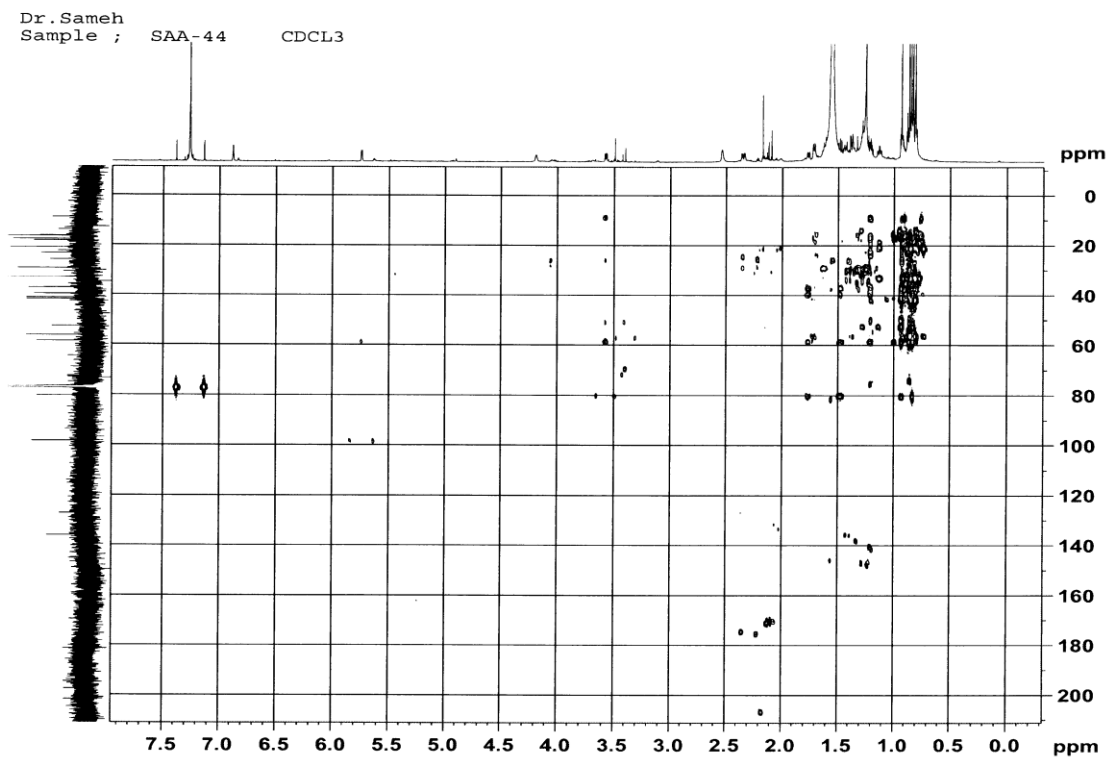

**Figure S5.** HMBC spectrum of compound **14** (CDCl<sub>3</sub>)

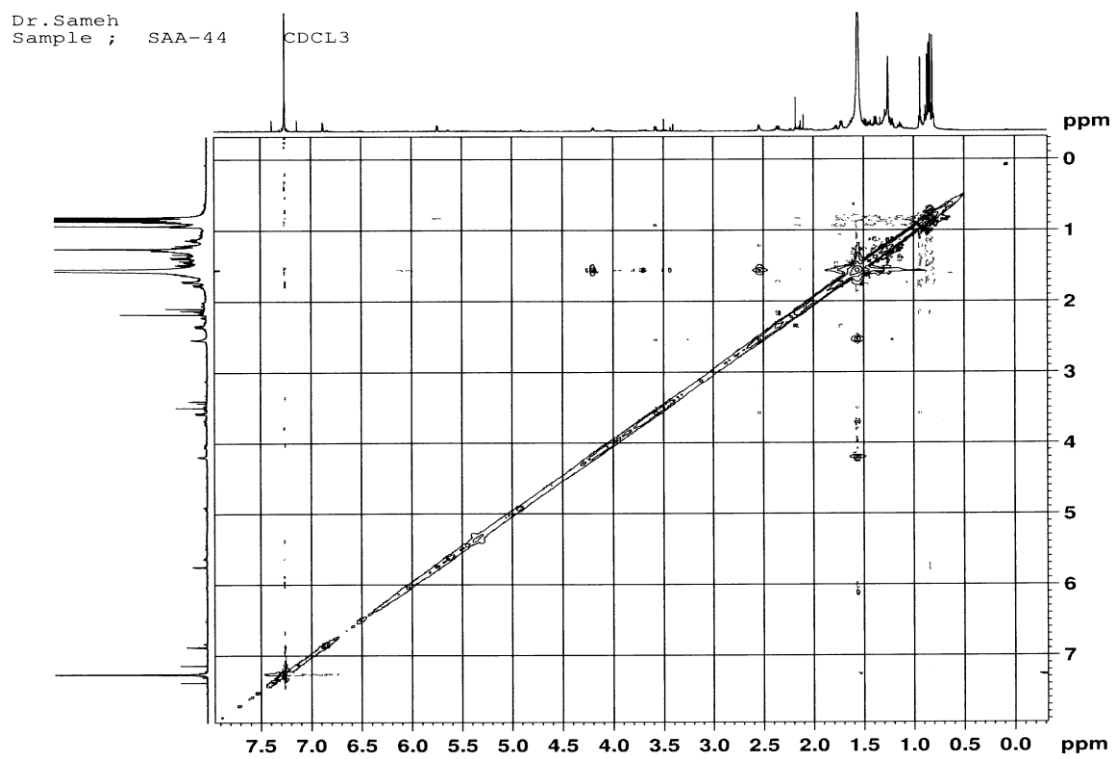

**Figure S6.** NOESY spectrum of compound **14** (CDCl<sub>3</sub>)
